# Supplementary material for: Aromaticities of Five Membered Heterocycles through Dimethyldihydropyrenes Probe by Magnetic and Geometric Criteria
Source: Hindawi journal article supplement (doi:10.1155/2015/456961), 2015-01-01
Supplement: f1 [file 456961.f1.docx]

**Supplementary Information**

**Aromaticities of Five Membered Heterocycles through Dimethyldihydropyrenes Probe by Magnetic and Geometric Criteria**

Mariaa, Khurshid Ayub,a,b*

a Department of Chemistry, COMSATS Institute of Information Technology, Abbottabad, Pakistan 22060

b Department of Chemistry, College of Science, King Faisal University, Al Ahsa 31982, Saudi Arabia

[kayub@kfu.edu.sa](mailto:kayub@kfu.edu.sa)

[Khurshid@ciit.net.pk](mailto:Khurshid@ciit.net.pk)

Cartesian Coordinates

**12**

C -0.02715000 0.07253400 0.00857100

C -0.01190400 -0.00900300 1.39116300

C 1.20054200 -0.00181700 2.11569600

C 2.40584700 0.20468300 -0.13578800

C 1.16893000 0.22114200 -0.74375400

C 1.26668000 0.02022600 3.50186300

C 3.70620400 0.24323200 3.52965500

C 2.50133900 0.05220400 4.19168500

C 4.96180800 0.25231400 4.17736700

H 4.99501600 0.13375900 5.25910300

C 6.14103100 0.34493300 3.45785000

C 6.15291400 0.38932200 2.03696700

C 4.98459300 0.42345500 1.30983800

H 0.34060600 -0.01250100 4.07362400

H -0.97914800 0.08953700 -0.51604500

H -0.95100100 -0.02883300 1.94158700

H 1.08251300 0.39959700 -1.81478900

H 2.50657500 -0.05273900 5.27536100

H 7.09100400 0.32336000 3.98649500

H 7.11021500 0.35319300 1.52147500

C 3.65090000 0.61349400 2.04421200

C 2.51338400 -0.18260700 1.34590400

C 3.38011500 2.16255900 2.02018900

H 3.33469500 2.54359700 0.99578300

H 4.19706200 2.67141600 2.54071300

H 2.44244600 2.40405700 2.52867800

C 2.79284900 -1.72857500 1.36017900

H 1.96510000 -2.24234300 0.86152800

H 2.86489300 -2.10475400 2.38453300

H 3.71903700 -1.97060000 0.83020000

N 3.91222600 0.48583700 -2.13435400

C 5.91775400 0.54253700 -1.13080300

C 5.27480400 0.56991300 -2.34344100

H 3.22001900 0.41788000 -2.86464700

H 6.98656000 0.61682000 -0.98406900

H 5.67362200 0.65193400 -3.34532900

C 3.65579300 0.38209100 -0.77951500

C 4.90847500 0.43183100 -0.11444700

**18**

C 0.00065500 -0.00522600 0.00003100

C 0.00151400 0.00038300 1.38915600

C 1.20538000 0.00074300 2.11840200

C 2.43763100 0.02452200 -0.13122700

C 1.20039700 0.04602600 -0.74839600

C 1.26549400 0.10259300 3.50503400

C 3.71056100 0.23886600 3.52958600

C 2.49413600 0.13394200 4.19677800

C 4.95882000 0.23448200 4.18119800

H 4.98579500 0.17430000 5.26781200

C 6.14501600 0.23995800 3.46091600

C 6.16115100 0.19872000 2.04423800

C 4.99452300 0.23206300 1.30604400

H 0.33581400 0.13407700 4.07060500

H -0.94694800 0.01639400 -0.53221700

H -0.94166500 0.05655900 1.92973800

H 1.13560900 0.14717900 -1.82993000

H 2.49287400 0.09831200 5.28484300

H 7.09216500 0.21169200 3.99389600

H 7.12020400 0.09627300 1.54248600

C 3.67303900 0.51964300 2.02493800

C 2.51371300 -0.27401800 1.37128800

C 3.46128200 2.07313700 1.90129200

H 3.42905100 2.38846100 0.85443200

H 4.29675800 2.58393300 2.38938800

H 2.53365200 2.38124200 2.39177900

C 2.73382300 -1.82624300 1.47840500

H 1.88762600 -2.33779000 1.00991800

H 2.79274600 -2.14257300 2.52365100

H 3.64922300 -2.13354100 0.96434600

C 6.03887800 0.16772900 -1.04541900

C 5.64864600 0.15881300 -2.34758600

H 7.08025100 0.20122800 -0.74553400

H 6.27967300 0.17817100 -3.22726100

C 3.68683800 0.11937000 -0.78903700

C 4.93413500 0.15673100 -0.11817800

S 3.91170800 0.12594300 -2.53814700

**20**

C -0.00009400 -0.00059700 0.00005000

C -0.00017200 -0.00025600 1.39164600

C 1.19836700 0.00005500 2.12808500

C 2.42572000 0.04241900 -0.12002900

C 1.19810600 0.05681800 -0.75061900

C 1.25439700 0.08325500 3.51849300

C 3.70054000 0.23990600 3.55521800

C 2.47876700 0.11435900 4.21469600

C 4.94506000 0.24910700 4.20929500

H 4.96733900 0.17152500 5.29494000

C 6.14310500 0.29494900 3.50070200

C 6.17794100 0.26996100 2.08808600

C 5.00544800 0.27577300 1.35436000

H 0.32290900 0.09964000 4.08162400

H -0.94949100 0.01809900 -0.52923100

H -0.94595500 0.04786900 1.92859500

H 1.15558100 0.15563200 -1.83207800

H 2.47261600 0.06689100 5.30227400

H 7.08292100 0.28376000 4.04668500

H 7.13462800 0.20016500 1.57645500

C 3.66221900 0.54159500 2.05530300

C 2.50922900 -0.25735800 1.38329800

C 3.43407000 2.09239700 1.95052700

H 3.38989700 2.41881800 0.90712900

H 4.26753900 2.60729700 2.43773200

H 2.50716100 2.38740500 2.44997100

C 2.73776900 -1.81032200 1.48350800

H 1.89480500 -2.32288800 1.01075200

H 2.79645500 -2.13144000 2.52717400

H 3.65534400 -2.11245600 0.97032100

N 3.98038300 0.16059300 -2.12652400

C 5.26921400 0.19600400 -2.16798800

H 5.90641200 0.20971500 -3.04137700

C 3.68123200 0.14693500 -0.75848500

C 4.87988800 0.19597500 -0.03747100

O 5.90988100 0.21460200 -0.95857300

**21**

C -0.02317600 0.02553300 0.03801800

C -0.02937600 -0.03153600 1.40714400

C 1.18543900 -0.01985400 2.16004600

C 2.41212800 0.09689900 -0.07271800

C 1.20670200 0.14051100 -0.70099700

C 1.21744900 0.06359900 3.53195900

C 3.65700300 0.26915500 3.61151200

C 2.45147100 0.10869800 4.25301600

C 4.91097200 0.28502900 4.29715200

H 4.90914200 0.22766700 5.38408000

C 6.09627800 0.30256000 3.61067300

C 6.13395000 0.27312300 2.17198100

C 4.99379800 0.32793600 1.43015500

H 0.28116100 0.07907300 4.08712400

H -0.96235700 0.04438500 -0.50836000

H -0.97332400 -0.03358700 1.94940200

H 1.16579900 0.29344900 -1.77636400

H 2.43196900 0.03112800 5.33858000

H 7.03696400 0.28212100 4.15484500

H 7.10105400 0.17399000 1.68280700

C 3.64224300 0.57551300 2.11005700

C 2.50768900 -0.23995500 1.41776700

C 3.39152800 2.12341400 1.99764200

H 3.37907400 2.45653400 0.95557400

H 4.19492700 2.65308100 2.51840900

H 2.43923000 2.39508800 2.46165600

C 2.78374600 -1.78523300 1.49080300

H 1.95840500 -2.31719500 1.00829200

H 2.85279600 -2.12064700 2.52959100

H 3.71105100 -2.05351200 0.97491700

C 5.86955200 0.37300400 -1.01730100

C 3.69166500 0.22056700 -0.74225100

C 4.93588300 0.29625200 -0.01524800

H 6.94675100 0.46029900 -1.03674000

N 3.88160300 0.24788000 -2.05312300

O 5.26767600 0.34670700 -2.21693200

**22**

C 0.00093300 0.00408100 0.00141600

C 0.00127100 0.00346100 1.39143800

C 1.20336000 0.00048500 2.12250800

C 2.43608400 0.04109100 -0.12807700

C 1.20003800 0.06094700 -0.74720500

C 1.26266800 0.09198500 3.51086300

C 3.70707600 0.23676100 3.53861900

C 2.48990100 0.12204500 4.20452700

C 4.95645700 0.23310900 4.18743300

H 4.98400100 0.16346800 5.27349800

C 6.14454100 0.25417000 3.46681300

C 6.16385700 0.22531700 2.05074100

C 4.99118200 0.25318500 1.32326500

H 0.33257100 0.11616100 4.07607700

H -0.94654200 0.02577600 -0.53087800

H -0.94265700 0.05561800 1.93105800

H 1.13596700 0.16520000 -1.82869300

H 2.48708800 0.07846300 5.29228700

H 7.09098800 0.22916000 4.00109800

H 7.11185500 0.14019600 1.52735400

C 3.66705000 0.52833500 2.03749900

C 2.51240100 -0.26599400 1.37504100

C 3.44811200 2.08186400 1.92669200

H 3.41439800 2.40603000 0.88259300

H 4.28123700 2.59263300 2.41853500

H 2.51888400 2.38151400 2.41932600

C 2.73798700 -1.81806500 1.47400200

H 1.89511300 -2.33002800 0.99998100

H 2.79480700 -2.14024700 2.51749400

H 3.65648200 -2.11974500 0.96213000

C 5.71612900 0.17778000 -2.16883900

H 6.43214100 0.18872400 -2.98495700

C 3.68820600 0.14209000 -0.77639800

C 4.92598000 0.17932900 -0.09469000

S 3.99300100 0.15694500 -2.50924700

N 6.05022500 0.18394700 -0.91813900

**23**

C -0.00557600 -0.00511200 0.01329500

C -0.00579800 -0.00119300 1.38515700

C 1.21354000 0.00231800 2.12683600

C 2.43147100 -0.01802400 -0.11637500

C 1.21959600 0.03542600 -0.73628200

C 1.26271200 0.14106800 3.49504100

C 3.70868800 0.26275400 3.54103500

C 2.50422000 0.17334300 4.20060600

C 4.96813800 0.25874900 4.21189800

H 4.97835400 0.24366900 5.30025700

C 6.14473300 0.20441400 3.51024900

C 6.16080500 0.11475200 2.07561500

C 5.01510600 0.18039300 1.33964700

H 0.33309100 0.20961600 4.05736200

H -0.94783600 0.02125800 -0.52784700

H -0.94558100 0.05310600 1.93200000

H 1.17922300 0.13833500 -1.81717400

H 2.49478800 0.14274800 5.28874700

H 7.09152200 0.16952600 4.04306900

H 7.11869000 -0.04032500 1.58359900

C 3.68671000 0.50768600 2.02791100

C 2.52090200 -0.29383900 1.38403000

C 3.48967800 2.05736500 1.85449100

H 3.47053000 2.34662600 0.79942800

H 4.32131500 2.57805800 2.33884100

H 2.55651000 2.38338800 2.32244300

C 2.74179600 -1.84423500 1.52046400

H 1.89231300 -2.36489600 1.06850000

H 2.81026200 -2.13839800 2.57175100

H 3.65300700 -2.16663400 1.00703500

C 6.00348600 0.09731500 -1.02151800

C 3.69860300 0.03531700 -0.82437400

C 4.96113200 0.09237400 -0.10930300

H 7.06762600 0.15209700 -0.82958300

N 3.77540900 0.00781400 -2.15603200

S 5.37561600 0.04305200 -2.6116240

**24**

C 0.00985600 0.01180500 -0.00689400

C 0.00308100 -0.00699900 1.36700700

C 1.21581400 -0.00800700 2.11537000

C 2.44475500 0.02088200 -0.12538800

C 1.23455200 0.07341500 -0.75194400

C 1.25764600 0.10053200 3.48861400

C 3.70320500 0.23502600 3.55293400

C 2.49215400 0.12560300 4.20174700

C 4.95639100 0.23258400 4.23081800

H 4.95964400 0.19377800 5.31875100

C 6.14193700 0.21121300 3.53728800

C 6.17450600 0.15274100 2.10411600

C 5.03062800 0.21214200 1.36079000

H 0.32391600 0.14897200 4.04647500

H -0.93162100 0.04045200 -0.54973800

H -0.94068500 0.03153600 1.90847100

H 1.19516300 0.19492200 -1.83134600

H 2.47554400 0.07616500 5.28923700

H 7.08324500 0.17901900 4.08035200

H 7.13762800 0.02332300 1.61367500

C 3.69013900 0.51116500 2.04511100

C 2.52888000 -0.28110200 1.37403900

C 3.48502400 2.06350400 1.90647800

H 3.47365800 2.37519100 0.85782600

H 4.30957600 2.57714800 2.41022200

H 2.54629100 2.37319000 2.37438100

C 2.75420000 -1.83336900 1.48065000

H 1.90887200 -2.34724100 1.01319500

H 2.81637800 -2.14782500 2.52641200

H 3.66982200 -2.14083700 0.96626000

N 3.91651500 0.09337600 -2.12446700

C 5.93457400 0.16758000 -1.08100800

C 3.72080600 0.09678900 -0.79254200

C 4.96533800 0.14569600 -0.07721200

N 5.25638100 0.13764100 -2.25366900

H 7.01378900 0.21744700 -1.05085900

H 5.64918800 0.14277300 -3.18486200

**25**

C -0.02547300 -0.00043900 0.01327000

C -0.01045700 0.00519600 1.40054500

C 1.19958300 0.00163500 2.12501600

C 2.40830600 0.02184400 -0.13404400

C 1.17223300 0.04896500 -0.74582200

C 1.26838200 0.10078100 3.50984000

C 3.71513200 0.22037900 3.52881200

C 2.50155500 0.11988600 4.19908400

C 4.97008500 0.21505500 4.17353300

H 5.00040500 0.15419600 5.26014300

C 6.15516300 0.22498000 3.45199300

C 6.17250900 0.18984000 2.03330100

C 4.99993500 0.22223300 1.31253600

H 0.34175500 0.13963500 4.08023400

H -0.97749400 0.02459700 -0.51075700

H -0.94918800 0.06287800 1.94890400

H 1.09545800 0.15900300 -1.82675800

H 2.50232000 0.08007500 5.28700900

H 7.10177600 0.19801200 3.98624200

H 7.11774600 0.09647300 1.50544600

C 3.67273400 0.50628000 2.02576400

C 2.50272600 -0.28084200 1.37065800

C 3.46534100 2.06153100 1.91347200

H 3.43058600 2.38451400 0.86885700

H 4.30495900 2.56587600 2.40087400

H 2.54072900 2.36969400 2.40947400

C 2.71597400 -1.83356700 1.47639600

H 1.86575000 -2.34050300 1.00969200

H 2.77499200 -2.15137700 2.52109400

H 3.62982300 -2.14612200 0.96220800

N 4.00031400 0.11895400 -2.11752400

C 5.37318400 0.13277900 -2.19370400

H 3.36239000 0.05922000 -2.89801500

H 5.88808800 0.13372200 -3.14635700

C 3.66688100 0.11028400 -0.77002700

C 4.91048300 0.14747300 -0.10193900

N 5.95325900 0.15212700 -1.02029500

**26**

C -0.00004500 -0.00151100 -0.00143300

C -0.00043100 -0.00097100 1.38721200

C 1.19783900 0.00021400 2.13013300

C 2.42836300 0.05516600 -0.10613700

C 1.20601100 0.06762100 -0.74331600

C 1.24209700 0.09132700 3.51653900

C 3.68564200 0.24531100 3.57450900

C 2.46376000 0.12291700 4.22586100

C 4.93160300 0.24954600 4.23800100

H 4.94795800 0.17960600 5.32396100

C 6.12545600 0.27842000 3.53370000

C 6.16776800 0.25650300 2.11381600

C 5.00537300 0.28274800 1.37995600

C 4.90306700 0.22346800 -0.03251400

C 3.68873700 0.17223600 -0.72760000

H 0.30645700 0.11424600 4.07250300

H -0.94564300 0.01491900 -0.53630200

H -0.94657400 0.04779400 1.92349200

H 1.16405900 0.17481800 -1.82432400

H 2.44809400 0.07517000 5.31299200

H 7.06440000 0.25802300 4.08105400

H 7.12542700 0.17931300 1.60582900

C 3.66247800 0.54003400 2.07472500

C 2.51457800 -0.26048800 1.39530500

C 3.43765900 2.09433200 1.96709500

H 3.41888800 2.42642400 0.92536000

H 4.25759100 2.60789900 2.47737700

H 2.49731300 2.38315200 2.44431000

C 2.75086900 -1.80996000 1.49285600

H 1.91988800 -2.32730900 1.00416200

H 2.79561200 -2.13752500 2.53520700

H 3.67880900 -2.10459300 0.99297900

O 3.95027400 0.20502200 -2.04299700

N 5.90318800 0.26894900 -0.98964700

N 5.43719900 0.26366400 -2.14527500

**27**

C 0.01462500 -0.00152500 -0.01048600

C 0.01220700 0.01128800 1.37181700

C 1.21908200 0.00770300 2.11267400

C 2.44168500 -0.01190400 -0.13646800

C 1.22360000 0.02793800 -0.76464100

C 1.27300900 0.12226300 3.49275100

C 3.72126600 0.23475800 3.53238900

C 2.50595600 0.14297400 4.19168100

C 4.97107400 0.22888100 4.19611800

H 4.98364300 0.18386400 5.28371900

C 6.16323100 0.21572000 3.49606800

C 6.19044700 0.14973200 2.07331600

C 5.03212400 0.18628500 1.33623200

H 0.34322900 0.17412900 4.05625700

H -0.93172800 0.02604500 -0.54475400

H -0.93132200 0.07467100 1.91086800

H 1.18122000 0.11935800 -1.84659300

H 2.49798900 0.10944700 5.27980100

H 7.10459400 0.18761400 4.03815900

H 7.15305800 0.02355500 1.58014800

C 3.69440500 0.50425800 2.02466900

C 2.52384300 -0.28554700 1.36974200

C 3.49996100 2.05588000 1.87855900

H 3.47049900 2.35888900 0.82750700

H 4.33934600 2.56609100 2.36079600

H 2.57510900 2.38131000 2.36270600

C 2.72630500 -1.84089000 1.49609400

H 1.86917300 -2.34755800 1.04316400

H 2.79199900 -2.14152100 2.54544600

H 3.63175700 -2.17006000 0.97810200

N 3.98554900 0.02420600 -2.13559100

C 3.70921200 0.04847500 -0.78495400

C 4.92412400 0.09031300 -0.07738200

N 5.26886100 0.04099200 -2.30323300

H 6.86566400 0.11584200 -1.02398400

N 5.85772900 0.07337200 -1.07546500
